# Supplementary material
Source: PubMed Central journal article supplement (PMC2707191)
Supplement: supp_M109.008763_Suppdata.pdf [file supp_M109.008763_Suppdata.pdf]

Supplemental Fig. 1. Quantification of [ $^3\text{H}$ ] incorporation into DNA and RNA precursors into cells expressing HigB.

Supplemental Fig. 2. HigB and RelE toxicity does not depend on the presence of other characterized TA toxins. RNA was prepared from wild type or  $\otimes 6$  cells expressing either RelE or HigB and the samples subjected to Northern blot analysis. Bands intensities were quantified and plotted relative to the zero time point.

**A**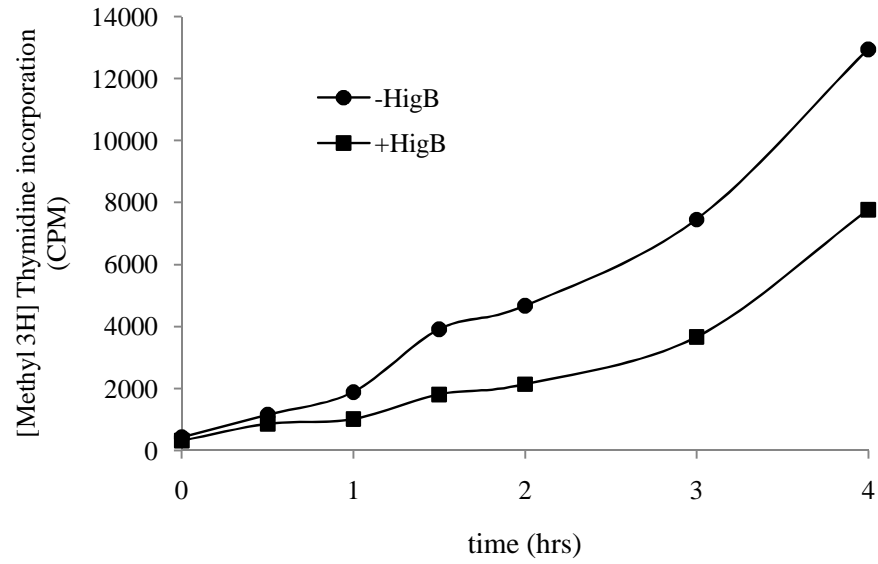**B**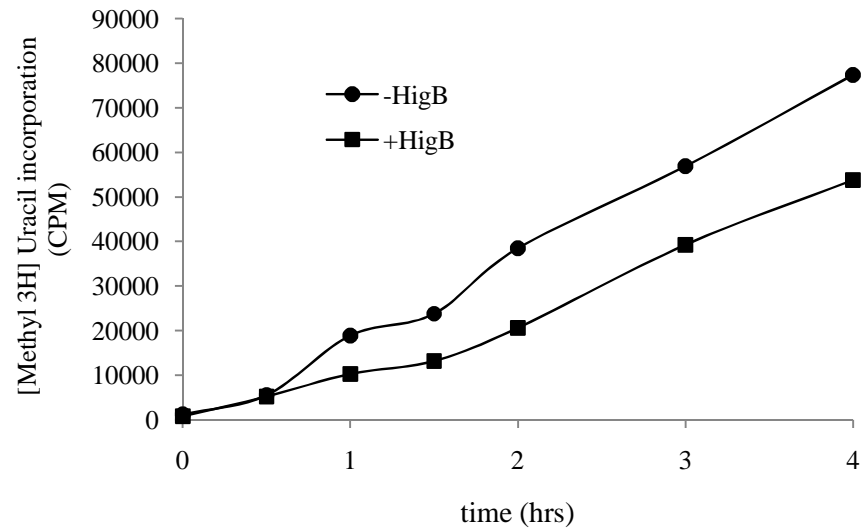

Supplementary Figure 1. Hurley and Woychik

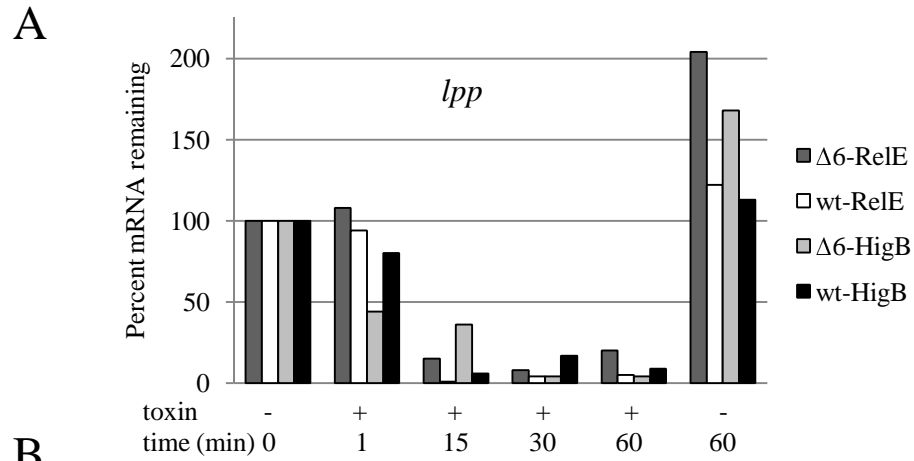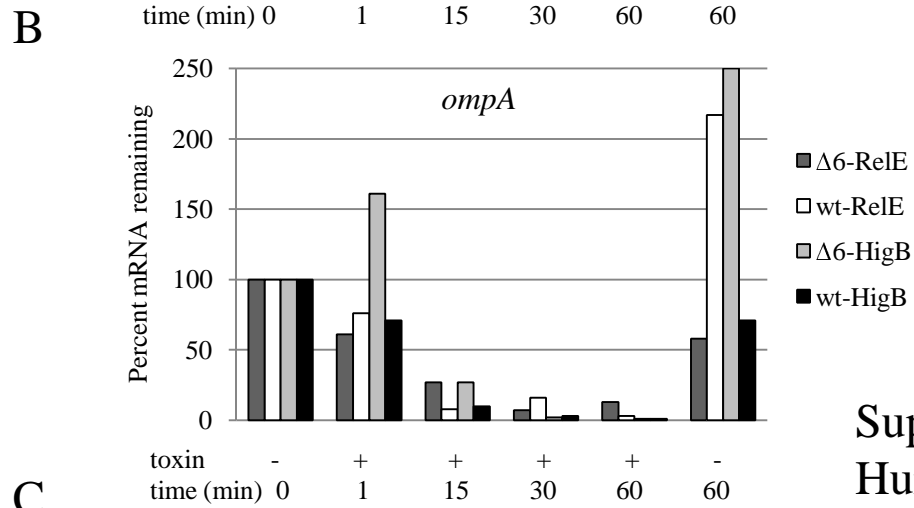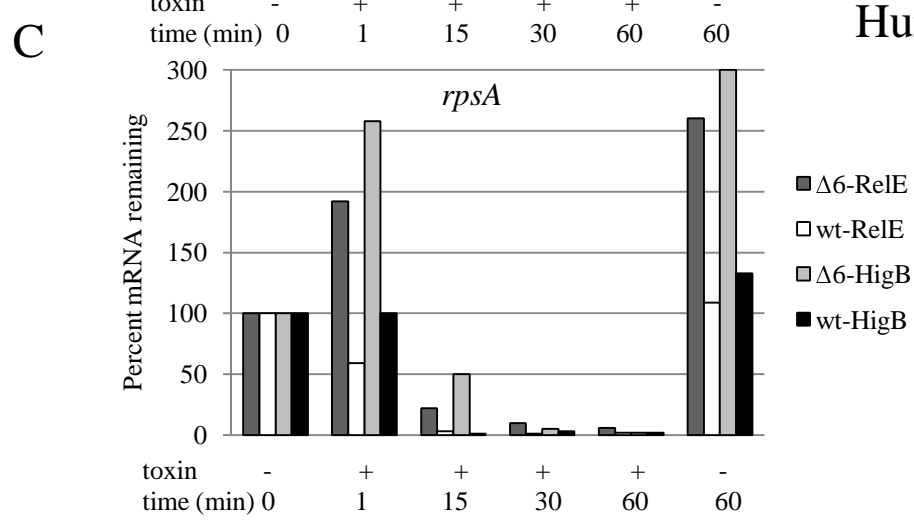

Supplementary Figure 2.  
Hurley and Woychik
